# Supplementary material
Source: Springer Nature journal article supplement (https://www.springermedizin.de/resource/supplementary/12936_2013_3713_MOESM4_ESM.pdf/9545178)

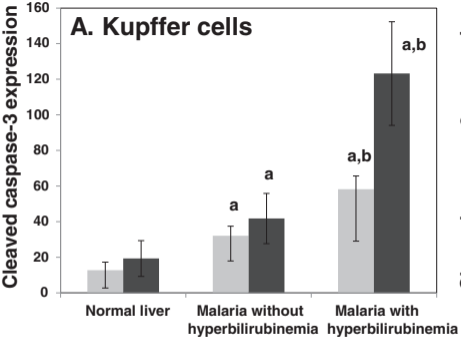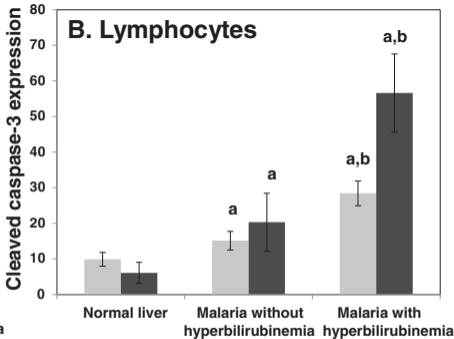

■ % positive cells

■ Total score = % positive cells X intensity

Supplement: MOESM4 [file 9545178]
